# Supplementary material for: Natural diversity of CRISPR spacers of Thermus: evidence of local spacer acquisition and global spacer exchange
Source: PubMed Central journal article supplement (PMC6452258; doi:10.1098/rstb.2018.0092), 2019-03-25

Supplementary Figure S2. Intersection of reconstructed I-A CRISPR arrays for *Thermas del Flaco* 1 and *Thermas del Flaco* 5. Arrows show direction from leader sequence.

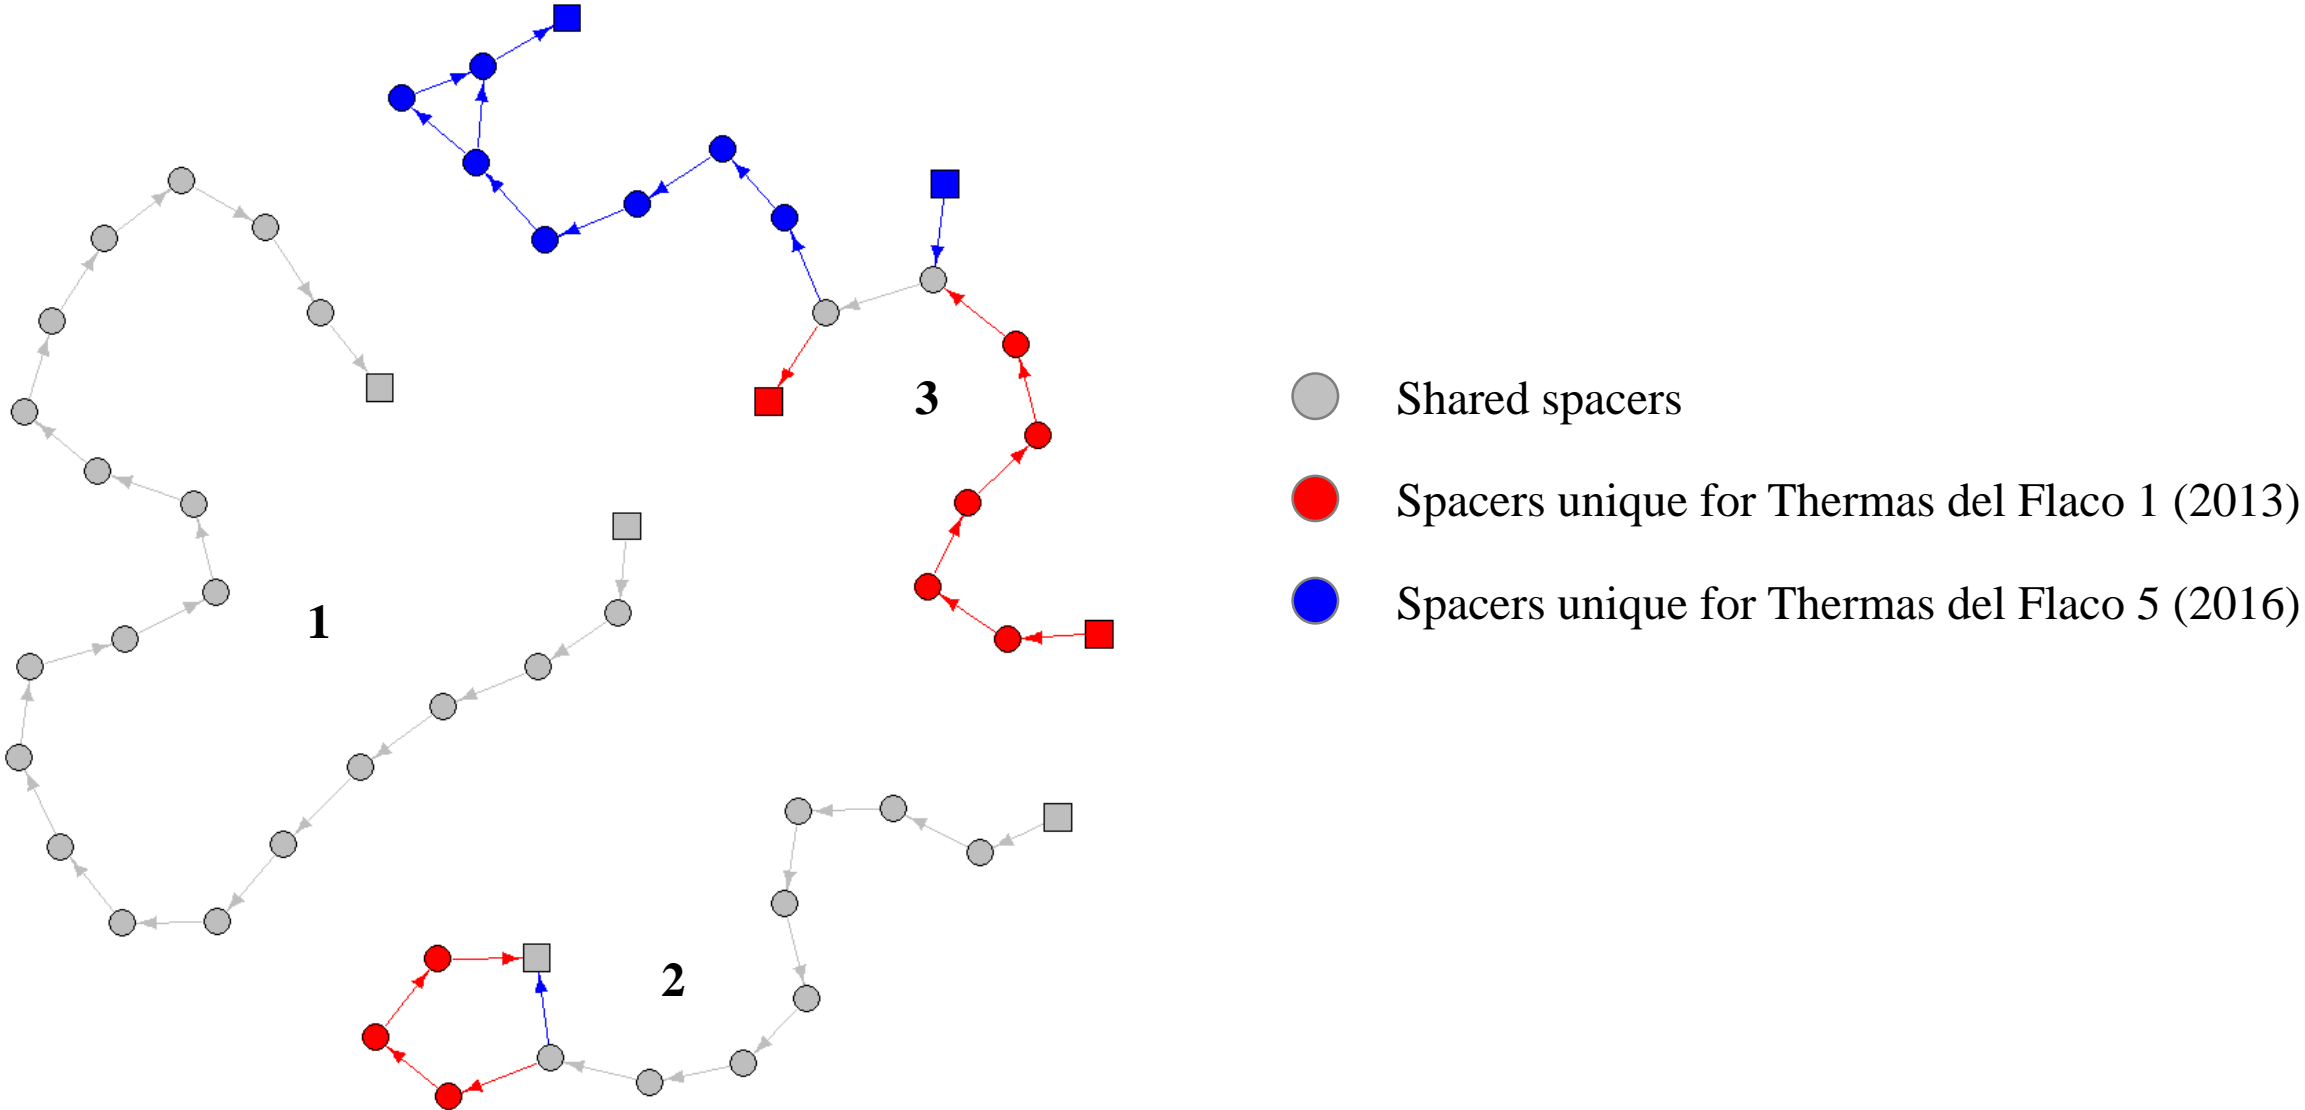

Supplement: rstb20180092supp2.pdf [file rstb20180092supp2.pdf]
