# Supplementary material for: Natural diversity of CRISPR spacers of Thermus: evidence of local spacer acquisition and global spacer exchange
Source: PubMed Central journal article supplement (PMC6452258; doi:10.1098/rstb.2018.0092), 2019-03-25

Supplementary Figure S3. The diversity of CRISPR spacers in environmental *Thermus* samples. The diversity of 14872 spacers (spacer cluster centers) associated with *Thermus* CRISPR repeats from enrichment cultures from samples collected at indicated sites is shown in circular diagram. Spacers from different locations that differ from each other by less than 2 nucleotides are connected by matching color lines.

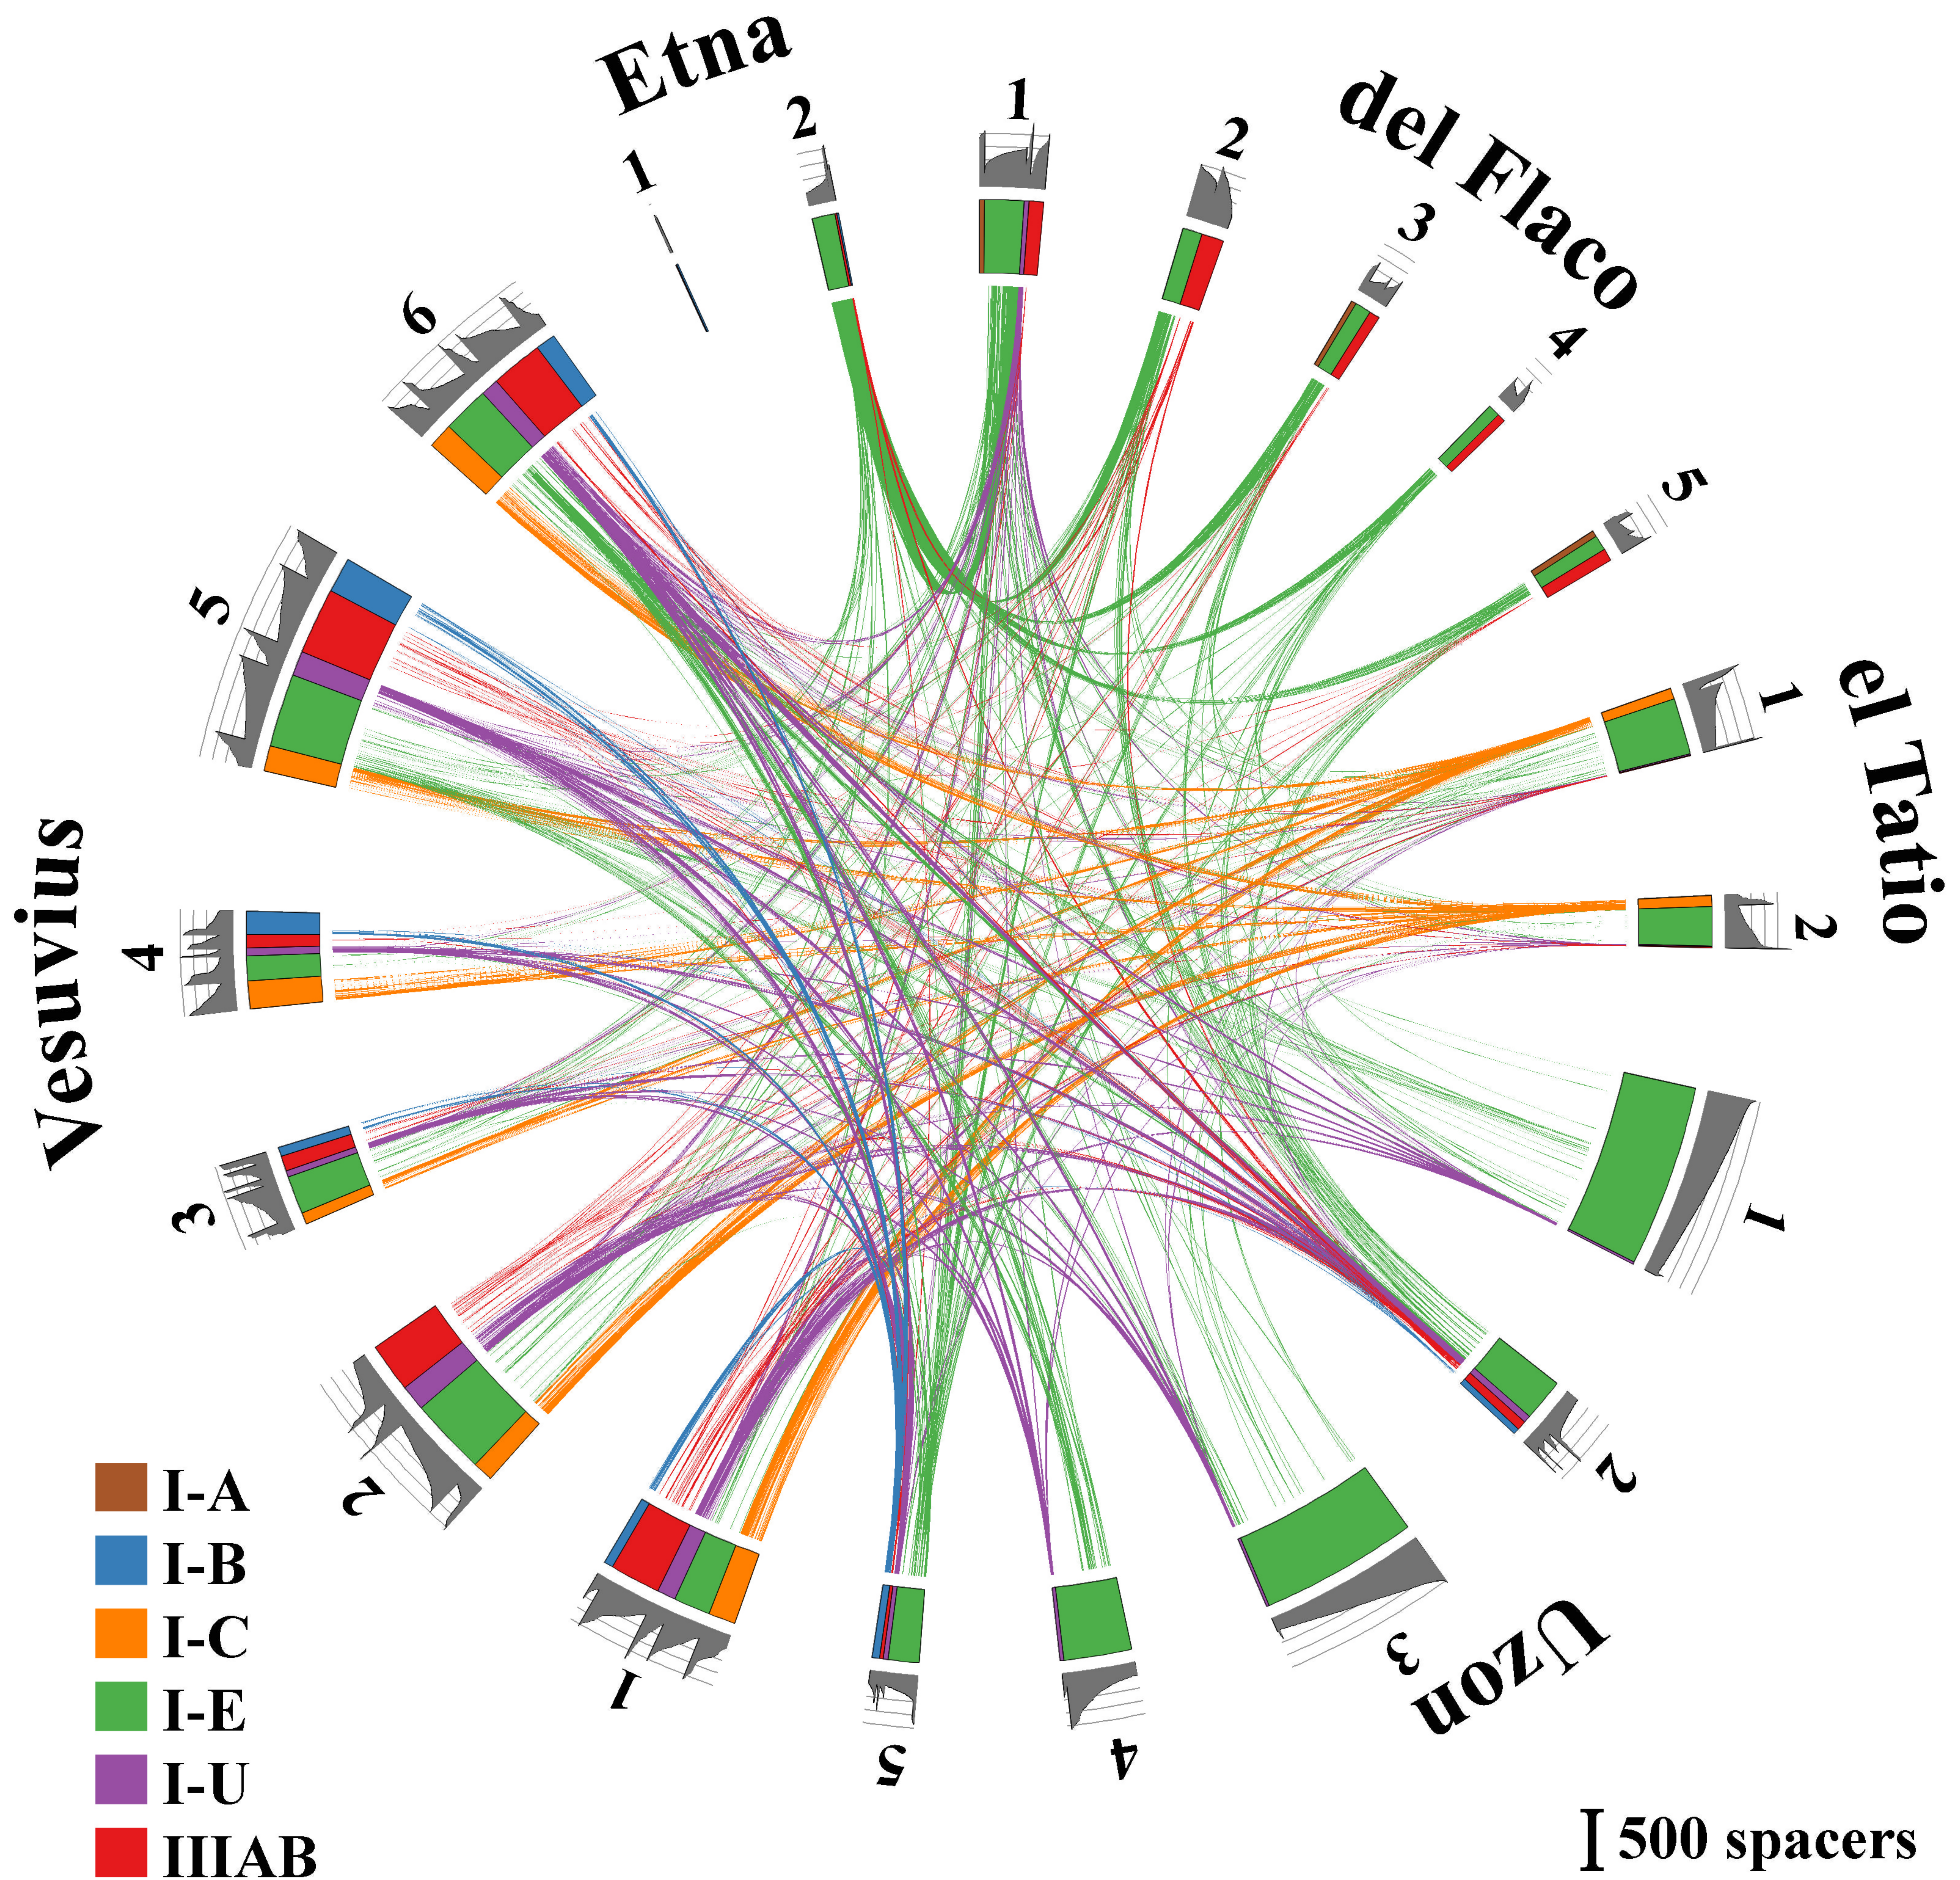

Supplement: rstb20180092supp7.pdf [file rstb20180092supp7.pdf]
