# Supplementary material for: Natural diversity of CRISPR spacers of Thermus: evidence of local spacer acquisition and global spacer exchange
Source: PubMed Central journal article supplement (PMC6452258; doi:10.1098/rstb.2018.0092), 2019-03-25
Supplement: rstb20180092supp10.pdf [file rstb20180092supp10.pdf]

Supplementary Figure S4. Clustering of samples by pairwise beta-diversity.

- A. Grey-scale heatmap with dendrogram of sample clustering
- B. Red-scale heatmap with number of shared spacers indicated in each cell

# Beta Diversity

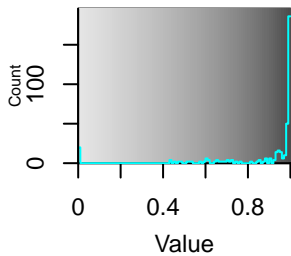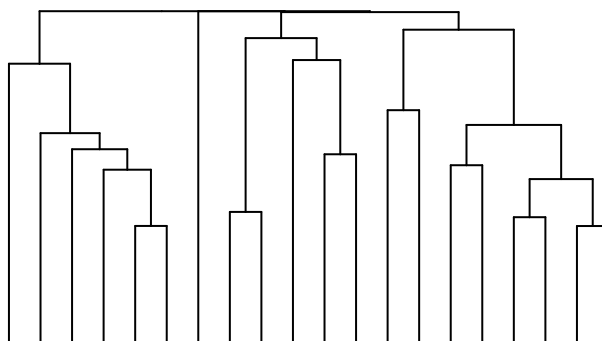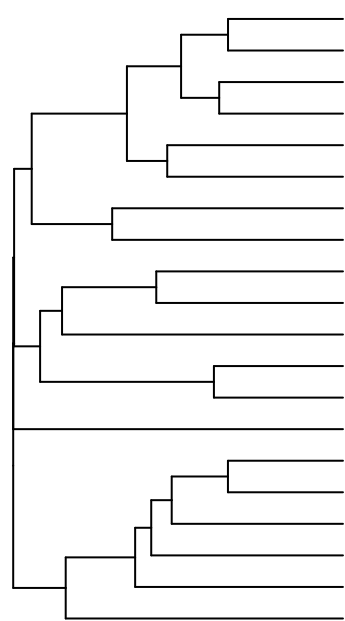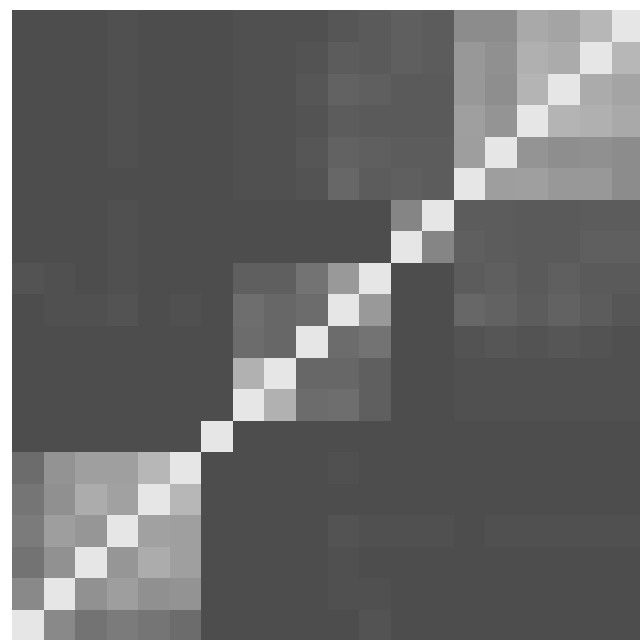

- Etna 2
- Del Flaco 2
- Del Flaco 4
- Del Flaco 1
- Del Flaco 3
- Del Flaco 5
- Etna 1
- Uzon 3
- Uzon 1
- Uzon 4
- Uzon 5
- Uzon 2
- El Tatío 2
- El Tatío 1
- Vesuvius 4
- Vesuvius 3
- Vesuvius 5
- Vesuvius 6
- Vesuvius 1
- Vesuvius 2

- Vesuvius 2
- Vesuvius 1
- Vesuvius 6
- Vesuvius 5
- Vesuvius 3
- Vesuvius 4
- El Tatío 1
- El Tatío 2
- Uzon 2
- Uzon 5
- Uzon 4
- Uzon 1
- Uzon 3
- Etna 1
- Del Flaco 5
- Del Flaco 3
- Del Flaco 1
- Del Flaco 4
- Del Flaco 2
- Etna 2

|        |             |             |             |             |             |        |        |        |        |        |        |            |            |            |            |            |            |            |            |             |
|--------|-------------|-------------|-------------|-------------|-------------|--------|--------|--------|--------|--------|--------|------------|------------|------------|------------|------------|------------|------------|------------|-------------|
| 4      | 7           | 3           | 19          | 7           | 3           | 1      | 23     | 21     | 26     | 39     | 66     | 79         | 74         | 387        | 366        | 915        | 712        | 853        | 1432       | Vesuvius 2  |
| 3      | 5           | 1           | 17          | 4           | 1           | 1      | 23     | 21     | 25     | 59     | 58     | 77         | 68         | 425        | 343        | 911        | 721        | 1187       | 853        | Vesuvius 1  |
| 3      | 3           | 0           | 26          | 2           | 2           | 1      | 30     | 38     | 43     | 87     | 86     | 60         | 57         | 467        | 360        | 1011       | 1365       | 721        | 712        | Vesuvius 6  |
| 6      | 9           | 4           | 25          | 7           | 4           | 1      | 28     | 33     | 37     | 82     | 82     | 74         | 69         | 649        | 508        | 1872       | 1011       | 911        | 915        | Vesuvius 5  |
| 4      | 4           | 1           | 14          | 3           | 2           | 0      | 25     | 22     | 28     | 54     | 53     | 40         | 45         | 347        | 674        | 508        | 360        | 343        | 366        | Vesuvius 3  |
| 2      | 2           | 0           | 6           | 1           | 2           | 1      | 24     | 23     | 29     | 73     | 52     | 55         | 53         | 812        | 347        | 649        | 467        | 425        | 387        | Vesuvius 4  |
| 4      | 2           | 3           | 12          | 2           | 2           | 0      | 5      | 3      | 2      | 4      | 2      | 154        | 587        | 53         | 45         | 69         | 57         | 68         | 74         | El Tatio 1  |
| 2      | 1           | 2           | 10          | 2           | 1           | 0      | 4      | 4      | 2      | 2      | 2      | 439        | 154        | 55         | 40         | 74         | 60         | 77         | 79         | El Tatio 2  |
| 16     | 12          | 5           | 15          | 5           | 5           | 0      | 78     | 89     | 113    | 205    | 552    | 2          | 2          | 52         | 53         | 82         | 86         | 58         | 66         | Uzon 2      |
| 3      | 10          | 4           | 15          | 4           | 5           | 0      | 146    | 122    | 74     | 393    | 205    | 2          | 4          | 73         | 54         | 82         | 87         | 59         | 39         | Uzon 5      |
| 1      | 0           | 0           | 4           | 0           | 0           | 0      | 147    | 144    | 606    | 74     | 113    | 2          | 2          | 29         | 28         | 37         | 43         | 25         | 26         | Uzon 4      |
| 1      | 0           | 1           | 4           | 1           | 1           | 0      | 888    | 1559   | 144    | 122    | 89     | 4          | 3          | 23         | 22         | 33         | 38         | 21         | 21         | Uzon 1      |
| 3      | 0           | 1           | 5           | 0           | 1           | 0      | 1359   | 888    | 147    | 146    | 78     | 4          | 5          | 24         | 25         | 28         | 30         | 23         | 23         | Uzon 3      |
| 1      | 0           | 0           | 0           | 0           | 0           | 18     | 0      | 0      | 0      | 0      | 0      | 0          | 0          | 1          | 0          | 1          | 1          | 1          | 1          | Etna 1      |
| 41     | 125         | 110         | 199         | 182         | 289         | 0      | 1      | 1      | 0      | 5      | 5      | 1          | 2          | 2          | 2          | 4          | 2          | 1          | 3          | Del Flaco 5 |
| 49     | 115         | 126         | 197         | 270         | 182         | 0      | 0      | 1      | 0      | 4      | 5      | 2          | 2          | 1          | 3          | 7          | 2          | 4          | 7          | Del Flaco 3 |
| 91     | 211         | 149         | 539         | 197         | 199         | 0      | 5      | 4      | 4      | 15     | 15     | 10         | 12         | 6          | 14         | 25         | 26         | 17         | 19         | Del Flaco 1 |
| 39     | 99          | 173         | 149         | 126         | 110         | 0      | 1      | 1      | 0      | 4      | 5      | 2          | 3          | 0          | 1          | 4          | 0          | 1          | 3          | Del Flaco 4 |
| 92     | 352         | 99          | 211         | 115         | 125         | 0      | 0      | 0      | 0      | 10     | 12     | 1          | 2          | 2          | 4          | 9          | 3          | 5          | 7          | Del Flaco 2 |
| 226    | 92          | 39          | 91          | 49          | 41          | 1      | 3      | 1      | 1      | 3      | 16     | 2          | 4          | 2          | 4          | 6          | 3          | 3          | 4          | Etna 2      |
| Etna 2 | Del Flaco 2 | Del Flaco 4 | Del Flaco 1 | Del Flaco 3 | Del Flaco 5 | Etna 1 | Uzon 3 | Uzon 1 | Uzon 4 | Uzon 5 | Uzon 2 | El Tatio 2 | El Tatio 1 | Vesuvius 4 | Vesuvius 3 | Vesuvius 5 | Vesuvius 6 | Vesuvius 1 | Vesuvius 2 |             |
