# Supplementary material for: Natural diversity of CRISPR spacers of Thermus: evidence of local spacer acquisition and global spacer exchange
Source: PubMed Central journal article supplement (PMC6452258; doi:10.1098/rstb.2018.0092), 2019-03-25
Supplement: rstb20180092supp12.pdf [file rstb20180092supp12.pdf]

Supplementary Figure S6. Intersection of reconstructed I-C CRISPR arrays between Vesuvius and El Tatio samples. Arrows show direction from leader sequence.

Sample-specific deletion of spacer

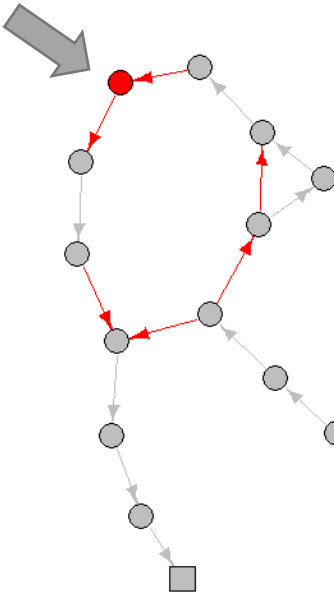

Sample-specific addition of spacer

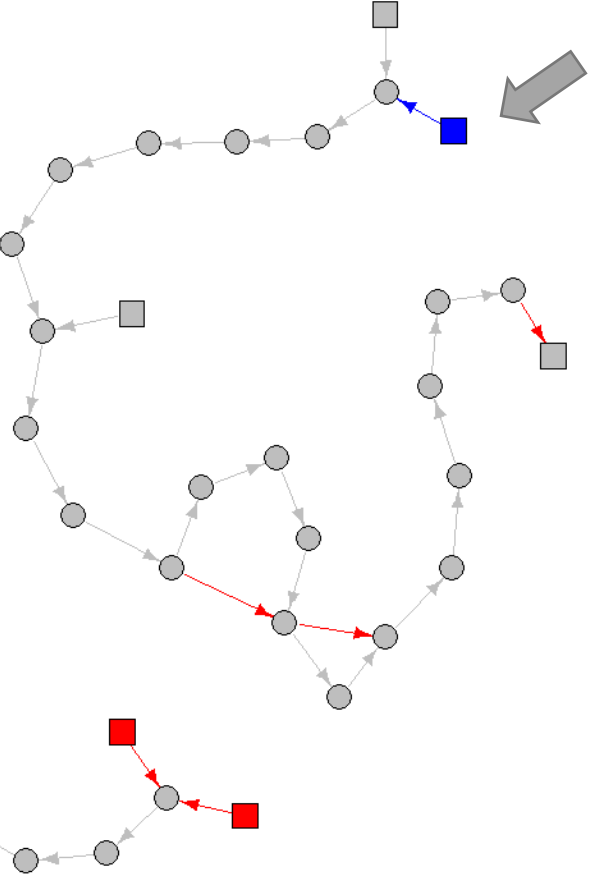

- Shared spacers
- Spacers unique for Vesuvius
- Spacers unique for El Tatio
