# Supplementary material for: Natural diversity of CRISPR spacers of Thermus: evidence of local spacer acquisition and global spacer exchange
Source: PubMed Central journal article supplement (PMC6452258; doi:10.1098/rstb.2018.0092), 2019-03-25
Supplement: rstb20180092supp13.pdf [file rstb20180092supp13.pdf]

# Supplementary figure S2. PAM motifs identified by matches to *Thermus* phages

## I-E system

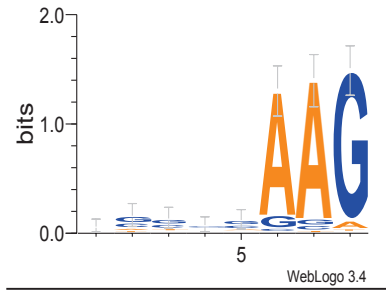

5' flank

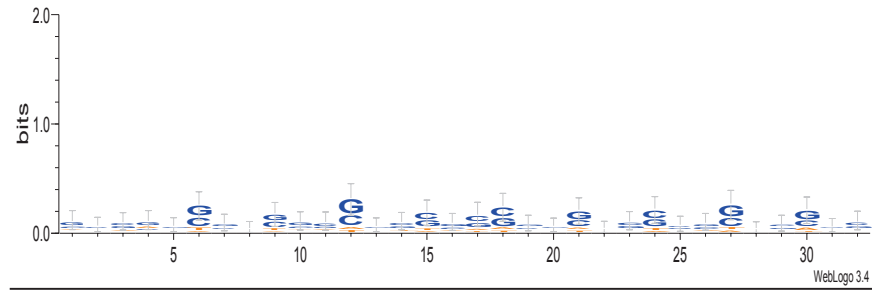

protospacer

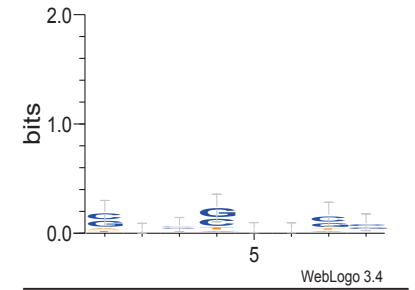

3' flank

## I-B system

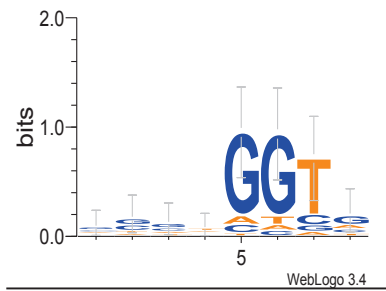

5' flank

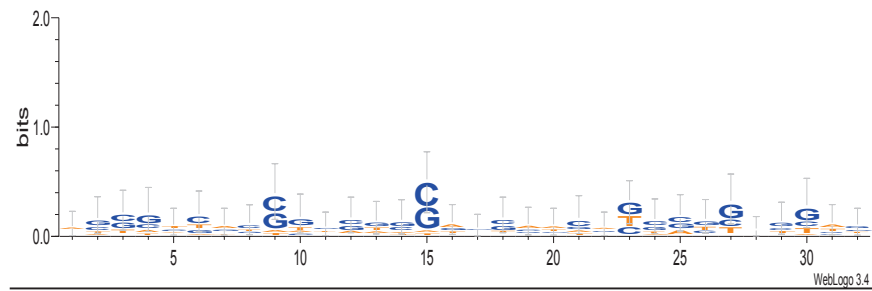

protospacer

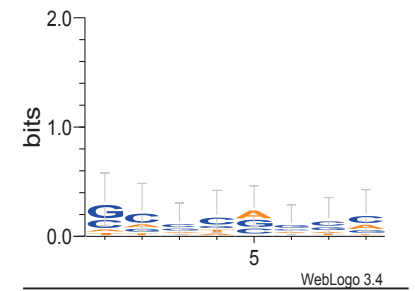

3' flank

## IIIAB system

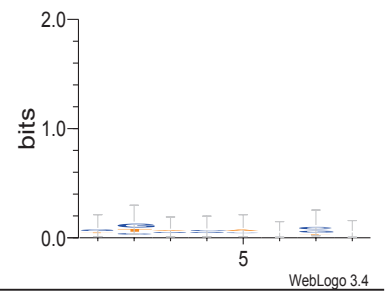

5' flank

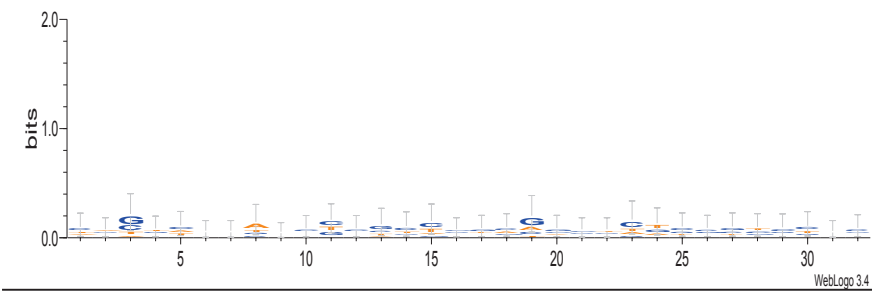

protospacer

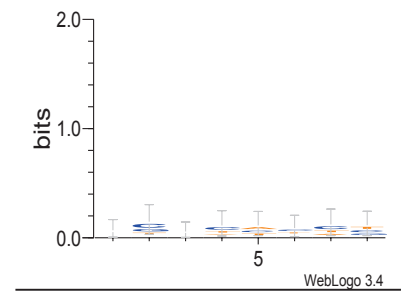

3' flank

## I-C system

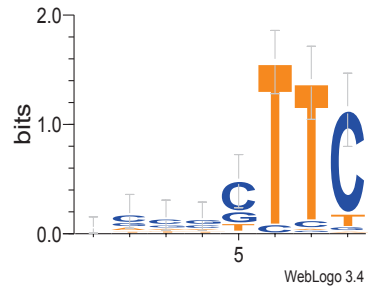

5' flank

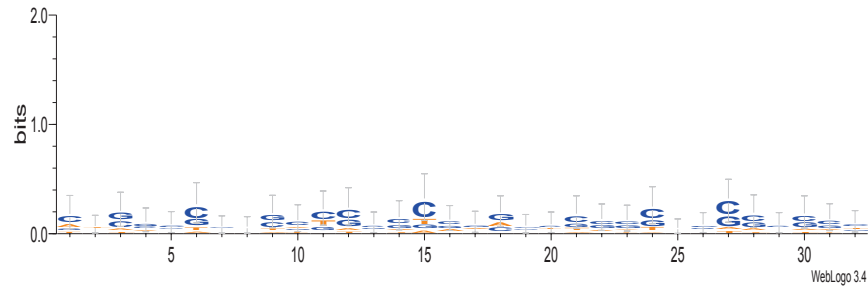

protospacer

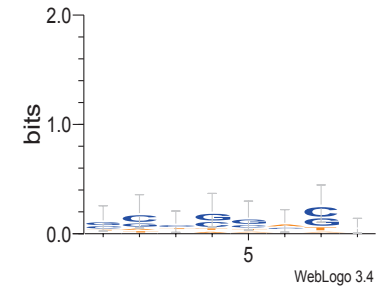

3' flank

## I-U system

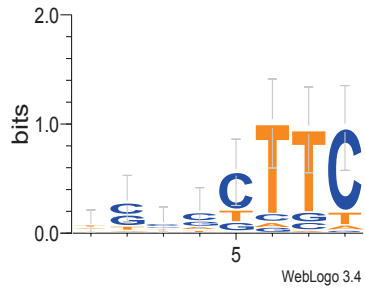

5' flank

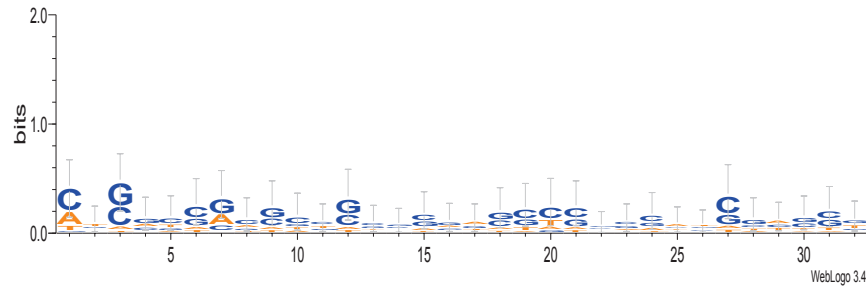

protospacer

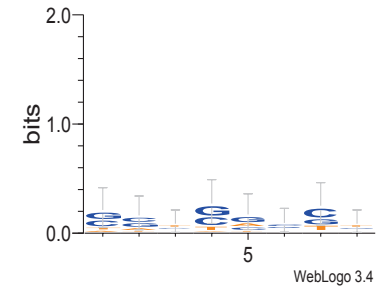

3' flank
