# Supplementary material for: Natural diversity of CRISPR spacers of Thermus: evidence of local spacer acquisition and global spacer exchange
Source: Philos Trans R Soc Lond B Biol Sci. 2019 Mar 25;374(1772):20180092. doi: 10.1098/rstb.2018.0092 (PMC6452258; doi:10.1098/rstb.2018.0092)
Supplement: Supplementary table S2 [file rstb20180092supp9.xlsx]

## Sheet: Лист1
Natural Diversity of CRISPR Spacers of Thermus: Evidence of Local Spacer Acquisition and Global Spacer Exchange
Supplementary table S2. A full list of 26 Тhermus isolates analyzed in this work.
№	Strain	number of spacers	isolation cite
1	Thermus amyloliquefaciens YIM 77409	53	China
2	Thermus antranikianii DSM 12462	1	Iceland
3	Thermus aquaticus YT-1	48	USA
4	Thermus aquaticus Y51MC23	25	USA
5	Thermus arciformis CGMCC 1_6992	17	China
6	Thermus brockianus GE-1	101	Iceland
7	Thermus filiformis ATCC 43280	55	New Zealand
8	Thermus igniterrae ATCC 700962	78	Iceland
9	Thermus kawarayensis JCM 12314	172	Japan
10	Thermus oshimai DSM 12092	115	Portugal
11	Thermus oshimai JL-2	140	USA
12	Thermus parvatiensis RL	12	India
13	Thermus scotoductus DSM 8553	61	Iceland
14	Thermus scotoductus KI2	36	Hawaii
15	Thermus scotoductus SA-01	49	South Africa
16	Thermus scotoductus K1	5	Azerbaijan
17	Thermus sp 2_9	25	Argentina
18	Thermus sp CCB_US3_UF1	96	Malaysia
19	Thermus sp JCM 17653	90	Japan
20	Thermus sp NMX2_A1	7	USA
21	Thermus tengchongensis YIM 77401	67	USA
22	Thermus thermophilus ATCC 33923	71	Japan
23	Thermus thermophilus HB27	74	Japan
24	Thermus thermophilus HB8	124	Japan
25	Thermus thermophilus JL-18	75	USA
26	Thermus thermophilus SG0_5JP17-16	54	USA
