# Supplementary material for: Natural diversity of CRISPR spacers of Thermus: evidence of local spacer acquisition and global spacer exchange
Source: Philos Trans R Soc Lond B Biol Sci. 2019 Mar 25;374(1772):20180092. doi: 10.1098/rstb.2018.0092 (PMC6452258; doi:10.1098/rstb.2018.0092)
Supplement: Supplementary table S3 [file rstb20180092supp4.xlsx]

## Sheet: Лист1
	Natural Diversity of CRISPR Spacers of Thermus: Evidence of Local Spacer Acquisition and Global Spacer Exchange
	Supplementary Table S3. Shared spacers from Thermus isolates
	I-E	I-A	Thermus_kawarayensis_JCM_12314	Thermus_aquaticus_Y51MC23	TAGGGCGCATTATGGGCGGCCCTCACCCCCCC	-------CATGTTGGGCGGCCCTCACCCCCCCCCACGCCCCCCGC
	I-E	I-E	Thermus_scotoductus_DSM_8553	Thermus_aquaticus_strain_YT-1	CTCTTCCTGGTCAGGCAGGACCTCGTAGTCAG	CTCTTCTTGGTCAGGCAGGACCTCGTAGTCA
	I-E	I-E	Thermus_oshimai_JL-2	Thermus_igniterrae_ATCC_700962	GAGGATTTGGGGGGCGTCCACCACGACCCGGAC	GAGGATTTGGGGGGCGTCCACCACGACCCGGA-
	I-E	hybrid	Thermus_oshimai_JL-2	Thermus_kawarayensis_JCM_12314	----ACGTCCTTCCACTCCATCAGCAGAACACCCCC	CAGGACGTCTTTCCACTCCATCAGCAGACCACCCCC
	hybrid	I-E	Thermus_thermophilus_HB27	Thermus_oshimai_DSM_12092	-GTGCGGCTCGTGACCAAGTAGCCATGGGGTACTT	TACCCCATGGCTACCTGGTCACGAGCCGCACC
	I-E	I-E	Thermus_thermophilus_JL-18	Thermus_oshimai_JL-2	CTGGGCAAAACTCTACCCTGCCCCCGGTGCGG	---------ACTCTACCCTGCCCCCGGTGCGGCTCCACGGA
	III	III	Thermus_scotoductus_SA-01	Thermus_arciformis_strain_CGMCC_1_6992	AGAAGCTCGCGGCGGAGGGTTTGGGCGTCCTTCTTCTC	AGAAGCTCGCGGCGGAGGGTTTGGGCGTCCTTCTTCTC
	III	III	Thermus_oshimai_JL-2	Thermus_oshimai_DSM_12092	ACGATTACCTCTTGGCCGATGGCCACTTGCTTGGCTGT	ACGATTACCTCTTGGCCGATGGCCACTTGCTTGGCTGT
	I-E	I-E	Thermus_scotoductus_KI2	Thermus_scotoductus_DSM_8553	CATCGGAGGAGGTGGGATGATGCGCAGGGCAA	CATCGGAGGAGGTGGGATGATGCGCAGGGCAA
	I-E	I-E	Thermus_scotoductus_SA-01	Thermus_scotoductus_DSM_8553	CATCGGAGGAGGTGGGATGATGCGCAGGGCAA	CATCGGAGGAGGTGGGATGATGCGCAGGGCAA
	I-E	I-E	Thermus_scotoductus_strain_K1	Thermus_scotoductus_DSM_8553	CATCGGAGGAGGTGGGATGATGCGCAGGGCAA	CATCGGAGGAGGTGGGATGATGCGCAGGGCAA
	I-E	I-E	Thermus_scotoductus_SA-01	Thermus_scotoductus_KI2	CATCGGAGGAGGTGGGATGATGCGCAGGGCAA	CATCGGAGGAGGTGGGATGATGCGCAGGGCAA
	I-E	I-E	Thermus_scotoductus_strain_K1	Thermus_scotoductus_KI2	CATCGGAGGAGGTGGGATGATGCGCAGGGCAA	CATCGGAGGAGGTGGGATGATGCGCAGGGCAA
	I-E	I-E	Thermus_scotoductus_strain_K1	Thermus_scotoductus_SA-01	CATCGGAGGAGGTGGGATGATGCGCAGGGCAA	CATCGGAGGAGGTGGGATGATGCGCAGGGCAA
	I-C	I-C	Thermus_thermophilus_HB27	Thermus_thermophilus_ATCC_33923	TATGGGTGGTTCTATTGGGTGGTTAGGGGCAACTGGGT	TATGGGTGGTTCTATTGGGTGGTTAGGGGCAACTGGGT
	I-C	I-C	Thermus_thermophilus_HB27	Thermus_thermophilus_ATCC_33923	AGGTCCTCGGCCTGGACCTACAGGCGGAGAGCGC	AGGTCCTCGGCCTGGACCTACAGGCGGAGAGCGC
	I-C	I-C	Thermus_thermophilus_HB27	Thermus_thermophilus_ATCC_33923	CACCAGGTGCTCCAGCTCATTAAGAGCCAGGCGGCCAG	CACCAGGTGCTCCAGCTCATTAAGAGCCAGGCGGCCAG
	I-C	I-C	Thermus_thermophilus_HB27	Thermus_thermophilus_ATCC_33923	CGGGAGGAGGCGCTGGAGGTGCGGAGCTACGAGGC	CGGGAGGAGGCGCTGGAGGTGCGGAGCTACGAGGC
	I-C	I-C	Thermus_thermophilus_HB27	Thermus_thermophilus_ATCC_33923	CCCTCAGGGTCCGTTACTTCCACAAAAGTTTTAAAGTG	CCCTCAGGGTCCGTTACTTCCACAAAAGTTTTAAAGTG
	I-C	I-C	Thermus_thermophilus_HB27	Thermus_thermophilus_ATCC_33923	GCACAGCTTTCGGACGGTGGCTGGCGAAACCCCCAACTC	GCACAGCTTTCGGACGGTGGCTGGCGAAACCCCCAACTC
	I-C	I-C	Thermus_thermophilus_HB27	Thermus_thermophilus_ATCC_33923	ATGCCCAAGAGGTTGAGCACGCTGCACCTCCTTGCCGAT	ATGCCCAAGAGGTTGAGCACGCTGCACCTCCTTGCCGAT
	I-C	I-C	Thermus_thermophilus_HB27	Thermus_thermophilus_ATCC_33923	CCGCCCGGTCCCTGGAGCACCAGCCTGTCCCAC	CCGCCCGGTCCCTGGAGCACCAGCCTGTCCCAC
	III	III	Thermus_thermophilus_HB8	Thermus_thermophilus_HB27	TTCGAAGCGCCCCGCCCCGAGGCACTTCCCACACCCTTTCCC	TTCGAAGCGCCCCGCCCCGAGGCACTTCCCACACCCTTTCCC
	III	III	Thermus_thermophilus_HB8	Thermus_thermophilus_HB27	GTGCTCCTTCAAACTCCTCTCCAGAGCCTCCTGGATCAGTTCAT	GTGCTCCTTCAAACTCCTCTCCAGAGCCTCCTGGATCAGTTCAT
	III	III	Thermus_thermophilus_HB8	Thermus_thermophilus_HB27	ACTCCCTCTACGCCCCCTAACTCGCGGTACGCGAAGAGGG	ACTCCCTCTACGCCCCCTAACTCGCGGTACGCGAAGAGGG
	III	III	Thermus_thermophilus_HB8	Thermus_thermophilus_HB27	GACAGGTAAGGGTGTAGAGGTCGTCCAGCTTCATAA	GACAGGTAAGGGTGTAGAGGTCGTCCAGCTTCATAA
	III	III	Thermus_thermophilus_HB8	Thermus_thermophilus_HB27	AAGTGAGGATGTACCCCCGCCCCTTGAGCTTCTTCTC	AAGTGAGGATGTACCCCCGCCCCTTGAGCTTCTTCTC
	III	III	Thermus_thermophilus_HB8	Thermus_thermophilus_HB27	CTTTGCGCCGCGCGGCCTAGCGCCGACCGCGTATCCC	CTTTGCGCCGCGCGGCCTAGCGCCGACCGCGTATCCC
	III	III	Thermus_thermophilus_HB8	Thermus_thermophilus_HB27	CTTTAAGGGAGTCGCCTTCGCCCACGTCTTCCTTGGT	CTTTAAGGGAGTCGCCTTCGCCCACGTCTTCCTTGGT
	III	III	Thermus_thermophilus_HB8	Thermus_thermophilus_HB27	GCGAGGAGCCGCCGCACCCCGATGATGCGCCCCTGGTC	GCGAGGAGCCGCCGCACCCCGATGATGCGCCCCTGGTC
	III	III	Thermus_thermophilus_HB8	Thermus_thermophilus_HB27	TCCTTCTTTGGGCCAGCTGATGCCCCAGGCAAGCCCCGGT	TCCTTCTTTGGGCCAGCTGATGCCCCAGGCAAGCCCCGGT
	III	III	Thermus_thermophilus_HB8	Thermus_thermophilus_HB27	GCTTCTCCGTTGCGCTGAGTTCGCCGTTGCTCCAGACATGG	GCTTCTCCGTTGCGCTGAGTTCGCCGTTGCTCCAGACATGG
	III	III	Thermus_thermophilus_HB8	Thermus_thermophilus_HB27	GTGTGGCCGCGGCTGCGCGCCGCGCGGCCCTTGCGCCCATGC	GTGTGGCCGCGGCTGCGCGCCGCGCGGCCCTTGCGCCCATGC
	I-E	I-E	Thermus_thermophilus_JL-18	Thermus_thermophilus_HB8	GCAACCCCAGGGTTCAGGGGTTCAGTCGCCCAC	GCAACCCCAGGGTTCAGGGGTTCAGTCGCCCAT
