# Supplementary material for: Natural diversity of CRISPR spacers of Thermus: evidence of local spacer acquisition and global spacer exchange
Source: Philos Trans R Soc Lond B Biol Sci. 2019 Mar 25;374(1772):20180092. doi: 10.1098/rstb.2018.0092 (PMC6452258; doi:10.1098/rstb.2018.0092)
Supplement: Supplementary table S5 [file rstb20180092supp3.xlsx]

## Sheet: Reconstructed arrays
Natural Diversity of CRISPR Spacers of Thermus: Evidence of Local Spacer Acquisition and Global Spacer Exchange
Supplementary table S5. Reconstructed CRISPR arrays. Vesuvius and el Tatio samples share two CRISPR arrays.
CRISPR-Cas type	Sample1	Sample2	length	Spacers
I-C	Vesuvius	el Tatio	20	TGGTCCACGCTGTGCATTGTGCTAAAGCTTTGATTGAG	CAGGACGCCCCGGCGGCCCCCTCCCCTACCCCTCAGC	CTCCTCCCCTCCGAGCGCAAGTTTCCGTACAAGCGCTA	GGCTCCTCCAGGACCACCAAATAGGGGATGCGGTT	ACCCCACGGCCCGGGCGGTTCGGAAGGTCCAGGTCTGTTG	AACTTGGCCGCGAAATACTCGCGGTAGAGGGCTATGAC	ATGGCCCGCTTTTTGATGCGCTCCATTCTACGCCTG	AATCCTCCGAACCGCGCTCATGGCGCTTTCGGAGA	GCGAACGAGCAGGAGTTTATCGCCGCGCTGGGGCGGTTG	ATGGTACCCTATCGGGTTAGCCCAGTCAAGCCCCAT	CTGGTGCACTCGGCTTTGGGCGTAGGTCCCCGTCCCCC	TACGAGGTGGCCGAGGTGAACGGGACGCGGGCGGA	AGGTCATTCCCCGCAAGCCACTTGATGGCCTTCCAG	CACTCAAAGTAGGTTGTGGGGGAAACTGACGAGCCG	ACCAGGTGGTGAACGAGGTTCACCAGGGGTGGTGAACGG	AGCGCATCGTGCCAGTCCCGGGGCTCCCTAGCCGGGT	TTGGGAAGGTTTTCCGGGCTAATGAGTTTAGGGTCT	GGCACCAGCCCCATGCACTGCCAGCGCCGGATGCGCGCC	TGGTCCAGGGCGTAGACCACCTCGGCCTCGGTCTCC	GGGAGGGGATGGACTAGGCGCGTGGCCGCCCTCGTGGAGG
I-C	Vesuvius	el Tatio	8	ACCTACCCCGCGGCCCGCTTCTACTTCCCGGGCGGGG	ATTCACAATGCCAAACAGGCGCCTCAGCTCCTCGGCAAC	GTTGTGGGGGGAACCCTGATCTGGGTGGGCCTCCTCC	CGCCCGAAGGTGACCTCCACCGAACGGGCATAGGCCAC	CAGGACGCGATACTGCTCGGTGGTGGGCGGCACCTGGG	ATCACGGGGCCAATGTTCTCGGCGATGCCGATGTAG	CTCATCGGGGTAGACGGCGAACTCCCGCTCCACCAGGAG	CCGGCGAAGGCGATGGCCGTGTTGATCCCGGCGAGG
I-E	Etna		35	GCTGGCCTGCAGGACCTCCAGCATCTGGCGGG	GCCCTAGACTCGGGCTATCCCGCCATCAGCGGC	CCAGCGGATGGCGTCCTCATAGCGCATGCGCA	GCAACCCCAGGGTTCAGGGGTTCAGTCGCCCAT	TTCACCCAGCTTGACGGCGCCATCATTTCCCAC	GCCATCCCGAAGCCGTGCGGGTTGCCTTCCCAC	CTATCTTTCGCGAACTACCGGGCTTGGGCCGC	TAGGCCATCGTGTCTAGGGAGGGGTTAGACCC	GACGGTAGACCCCGAGACCGGGGAAATCCTGGA	GAAAGCCCGAACTCATGGCGGACCGCGAACAC	TGCCCCTCTGGCGGCCTAAGGAGGGTCATAAGC	GACGACATCCTTAGCGCCCTCCTCATGGCCCTAC	GTTCCGGCCTCCACCCTCCGGTACGCGGAGAA	ACCATGAGCGGCGAGTTAGGGTGCGAAATCGGG	GAGGCTCGCGGAGAAGGCCGCCACCTGCTCCCC	AGGTCATCGCCGCCAACATCGCCTATCTGCAA	GCCGGACGCAGAATATAAGACGACCTTTGTCTA	TAGGCAACCTCCTCAACGGGCTGATTCTCCACC	CTGACAGCCCCCACCCGTCACAGGAGGCTAGG	GGCCCTATCCAGTTTATCCTCAAGCTTGCGAGC	GGTTAGCGCTATAAGCCCAAGGCCAAGGGGGTG	ACCTCGTTGGGCGGCCAGAGAGAACAAGAGGG	GGGGCCGCAGACCTGGTGGCCTGGTGTGGAGGC	GGGCCGTAGTGCCTTGGGGCTCAGCAGCGCCTC	AGGGTACTCAACGAGGCGGACGACCCACTCGG	CTGGCCCGGGCGGCCTACCTGTGGCTCCTCCG	CCTTTAGCCCAGCCGTGGCCCAGGACCCGGGCC	CCCTCCGCCGTCCTGCAGGCCATGCTCCGGGCC	GTGAAAAATCGGTTCCCGGCGTAGACCTCCAC	CTTAGCCATTCGGCACCCCCTCCGGCCACGCC	GCGATGTTGCCGGTAGTAATAGTAATGGCAA	CCCCTGACACGACTCCGGGACGTGAAGCGGTC	TCCTCTAGCAAGGCGCGCCGCTCCCGCGGGGGC	GGTCTTACGACCCCTCCGGGCCGGGCCTCCGGC	CCGGAGGAGGTGCCCGACGAGCTTGCGGACGA
I-E	Etna		29	ACGCCACCCGCTCCTACTCCGAGGTGACCCGC	ACGATTTGGCCGGGGCCCTTTACGAGCTCTCT	GTAGACCTGGCCCGCTTCGCGGCCGCCACTCC	AGGTCATCGCCGCCAACATCGCCTATCTGCAA	GCCGGACGCAGAATATAAGACGACCTTTGTCTA	TAGGCAACCTCCTCAACGGGCTGATTCTCCACC	CTGACAGCCCCCACCCGTCACAGGAGGCTAGG	GGCCCTATCCAGTTTATCCTCAAGCTTGCGAGC	GGTTAGCGCTATAAGCCCAAGGCCAAGGGGGTG	ACCTCGTTGGGCGGCCAGAGAGAACAAGAGGG	GCCCTAGACTCGGGCTATCCCGCCATCAGCGGC	CCAGCGGATGGCGTCCTCATAGCGCATGCGCA	GCAACCCCAGGGTTCAGGGGTTCAGTCGCCCAT	TTCACCCAGCTTGACGGCGCCATCATTTCCCAC	GCCATCCCGAAGCCGTGCGGGTTGCCTTCCCAC	CTATCTTTCGCGAACTACCGGGCTTGGGCCGC	TAGGCCATCGTGTCTAGGGAGGGGTTAGACCC	GACGGTAGACCCCGAGACCGGGGAAATCCTGGA	GAAAGCCCGAACTCATGGCGGACCGCGAACAC	TGCCCCTCTGGCGGCCTAAGGAGGGTCATAAGC	GACGACATCCTTAGCGCCCTCCTCATGGCCCTAC	GTTCCGGCCTCCACCCTCCGGTACGCGGAGAA	ACCATGAGCGGCGAGTTAGGGTGCGAAATCGGG	GAGGCTCGCGGAGAAGGCCGCCACCTGCTCCCC	TCCGACCCGCGCCGCCTCCTCTCTCTCTCCCTG	ACTCGGGAGCCAAGACGTAGGTGGAGAACCGCC	GACATGACCCCCGAGCAGCGCCGCGCCCTCAAGC	GTGGAGTCTTCCCCTTCCTCTTCTGGCCCCCAGC	AGCTCCCGCTTGAGCTCGTCCAGGAGGTACTTCGC
III	Etna		7	TTCGAAGCGCCCCGCCCCGAGGCACTTCCCACACCCTTTCCC	GTGCTCCTTCAAACTCCTCTCCAGAGCCTCCTGGATCAGTTCAT	ACTCCCTCTACGCCCCCTAACTCGCGGTACGCGAAGAGGG	GACAGGTAAGGGTGTAGAGGTCGTCCAGCTTCATAA	AAGTGAGGATGTACCCCCGCCCCTTGAGCTTCTTCTC	CTTTGCGCCGCGCGGCCTAGCGCCGACCGCGTATCCC	CTTTAAGGGAGTCGCCTTCGCCCACGTCTTCCTTGGT
I-E	Vesuvius		10	TTCGTCCTCCCCGGCGGGCCGAACGCGGGGAA	GCGCTGGTCTACGGGAACCTGGTGGACCGGAGC	GTCTGGAATAGGGGAGCGCCCGCCGCTTTGGGC	GTCTCCGGCTCCACCTCTACCACCTCGTCCCC	AAGGTAACCGCTTCGGGTCGCCTACAGTACGA	CATGGCCCTGGGGTATTTCCGCCACATATCCCC	TGGACCGGGACCACGCCGTTTTCCAGGAGGTC	CACCATAGCCCGGGACACGGGGTTGACGCGGC	CCATCATCCAGGGAGCCATCATCCAGGGAGC	TTCGTCCTCCCCGGCGGGCCGAACATGGGGAA
I-E	Vesuvius		26	ATCGTCAACCGGGGAGTCCCGGGGGCCGTGGCC	GTCATGGATAAGGATGACCTTGACCCGCCCCC	GTGCTTCCCCGCTGGCTAGACCAGCGGTACTG	CCCCCCCAGGTGCCTGGAGCGACCCGTGCCTA	TCATCGGCGGCAAGCTTGAGGAAGTGGGCGTCC	CGAAGGTCTGGATTGAGCGCCGTGTGGATGAG	AGCTCCGGCAGGCCCATGCCGCCTGGCTGGAG	AGTGGGTCCCCGCCAAGAATGGCTTCATTACC	AAGAAGGCCCCGGAGGACGAGCCGTGGAGCAA	CTTGGCCGCGAGGAGGCCCACAAGTACGTCTCA	TCCATGCCGTTCACCAGTAGCGCGCTCATGCCC	ACCTCGGGACGGAGGGCCTGGGCCAGGCTGCCC	CAACTCCAGATCGGGGCGCTTCTCCGGCGCTGGC	GCGGTGTTCCAAGTCAGGCTACTGGCCCACCT	GCGGCTAGCCCGAGGGCCCCCACCCCTACCCC	CACTGGTGGCATGTGTTGCCCGGGGCGCTCCGC	CTCTACGAGGCCATCCTCCTCCAGGCTGGCGAGC	AGGCCCTATCCGCCGTGGGGAAGGACTGGAGGC	TCCTGGGAGGCCCCCCAGGACCTCGCGGACGA	CTTTCCTCACATTCTGGCGGAAAGCTTTGCTG	AATCGCCTTGCGGGTAGAGGCGTCCGGCACAA	CAGGCAGCGTAAGACGCAGCCCGTCACCTGGC	GAGGGAACCATGAAGCAGGTTAGCACGCAGGCA	TCCGGGGCCTCCTCCCCACCTTCTAGGGGCTC	GGGAGCGCCCGGCACCTCGCGGCCTTCAAGGT	ATTTCCGATCTAGAGGCTCAGGGGGTGTTCTG
I-E	Vesuvius		8	GGTGGACCCGAGGCCGACCGGGCCTTCCTGGAA	CCGGGGCGGTAGGCGATGGCCCAGGGGCCCCA	GTCTTGGGCGTCGACCCCGAGCCCACCACCGAGC	TTCGGCCACCATACTATCGGGGCAATACTCCAC	GGCGCATGGGCGCAAGGGCCGTGGGGCGACC	TCCCTGGCCGATGGGCTTCCCCGTAGCTCCTA	CCTATGGCGTAAGCCCGCCCTCCGGGTATGTGC	GCGGGAGGCTGGCCCACGCCGAACCCCTCCCCC
I-E	Vesuvius		7	AAGGGGGAGGCGTACCTGCTGGAGTGGCCTGA	GTGGCCTCCGCCGCCTCGTTGCTTAGCTCGTGC	GTAGCGCCCATTCCCCCTAGCCGCCCAGTAGT	AGATCGTGAAACCAATTCAGACCTTTGGGCGT	GCTAGTCAAGGAGGAGGTTATGTACAGGCTAA	CGCGCCGGGCTCCTGGACAAGGCGGGGGATATG	CTTTACGACCGGGTGGTCTACCTCAGGAACACCC
I-E	Vesuvius		9	CTCAAGGACTACTGGCATGAAGTGGAAGAGCCG	ACTTCGCCCTCTTTGGGCCTGAGCCCCCTGA	TTTCCGTACAAGCGCTACCGGAACGGGGAGTG	CGGCTTCTGGGCATCAAGGTGGTGGACGCTGA	CGAAGGGCGCCCCCTCCACCGCCCCCCAACACC	GCCTCCACGGGCGAGGCGGGCCTCCAGAGCCGC	TGACTTGGGAGATGCCAACGGGATGGAGTACA	ATAAAGCGGCGGAAGATAAGGAGGCGATAGCA	ACGGCTATGGCGGCCCCGGTGGGGCCCCACCC
I-E	Vesuvius		18	TGGACAAACTGGTGGCGCGGGCCTTGGACCGG	CACGCTCTGAACCCCAAGGGTGCTTTGGCGGT	GCGAACGGCATCGAGGCCGTCAACCGGGAAGA	TAGCGGTTCCCGGTACGGATGGTGACGGAGTGC	CTCCTCCGCGAGTTCGGAGGCCCTGTCCAAAAG	ACCCTCTGGGACCCGTACCCAGCCCCTGTGTT	TCCGGGTGGCTCGGACTTCTCATCGGCGTAGG	GCAGGCTACCCCCGCTTCAAGGGGAAGGGGCGC	GCTGGGAGCGAGGACATACGTGAGAGGCTGGAT	GACTTTGGCCGCCTTCATCATGGGCGCGTGGAA	AGGCAGGGCTAACTGGGGCCTGTGGGCCCTCGG	CACGGCTACGACATCAAGCCCAACGAGATAGA	ATGCGCCTGATGCTGGTGAGGAAGTTGTTGTT	TTCGGCCACCATACTATCGGGGCAATACTCCAC	GGCGCATGGGCGCAAGGGCCGTGGGGCGACC	TCCCTGGCCGATGGGCTTCCCCGTAGCTCCTA	CCTATGGCGTAAGCCCGCCCTCCGGGTATGTGC	GCGGGAGGCTGGCCCACGCCGAACCCCTCCCCC
I-E	Vesuvius		11	GTCAAAACATGGGTCTTCCCGGTCGCATTCAT	GTAGTCCGTAACCATTTCGGCGAGAACGTCAGC	CATTCGCTTTTATGGGGCGGGCCCCGACTACA	GCCGAGGATGCCCCCGGCGGCCACGGCCCCCGT	TAGCCAGTCGTGCCGCAGGGAGGGGGAAGCCCC	CAGGCGCAGGCGCAGGCCGCGCTCAACGTCAT	AACCGCCGGGCGGCTTCCGCCGCGCTTTCTATC	GTGGTGGTCTTCGCCCACCACCGGGCCGTCCTG	TATCGTATTGACAAGGCCATGATGGAGTCCCT	CTCCGCAGGGCCACCGAGGGCACCGCCCCCGCCC	GACCCCCAACGGCTCCGGGCTCTGGCCGAGCG
I-U	Vesuvius		8	CTAGGCACTCTCACCTCCTCCTGTCCGCCCCCTCCTCAG	TTGCGGGCTAGCTCCACCAGCCAGGCCCGCCAG	GTGAGGCAGATAGAAAGCGCGGCGGAAGCCGCCCGG	ATCTTTGAGGACGACGATGGGCGCCTCTCCGGCATC	ACGCCCAGCCCGGAGAGGGCCGCAGTGGCGCCGGGT	TTAAACCTTCCCTTGACGATCCCGTAGGGGGTGGG	TGGATCGGGGTGTACCGGGTGCTTCGCATCGGCGAAGAGAAT	TCCCTATAAGGACCCAAGGAGGTAAGCGATGGAAAAAGT
I-U	Vesuvius		9	ACGTCCGCCGCGATGCGGTTGGGGAAGAGGAAGCCCC	AGCAGGAAAATCAAAATGACTAGCCCCACGACTATCCA	AGGGCCAGTTCATAGGAGGAACATATGCTACCCCGT	ACCGATAGGCCCTGGGATGAGCTGAGTAGGGATGAGG	CCAGCGGTAGCGGTGAACTCCCCGGCGAGATGGGCCAC	CGCTCTCACCGGCCGGAGCCGCACAGGGGTCCCATCGGG	ATGGGCAACCTCAGTCTGGTGGCGAAGCACTTCGGCG	CTCTCTACGCCGAAAGGGAAAAACTTCTTCCACACG	TTCCACGCGTCGCTGTTCAGCCCCGCGCGCTGGGCGT
I-E	el Tatio		9	ACGGATGCGGGCCGGGTAGTTCCGAAACTCGA	CTAGTCTCACTTACCCAACGCATGGCCTCCGC	TGTTCCCCGCTACCGGGCCAACGGGGTCTTCAT	GCTCAGGGGCGGTATGCCTGCCGGGTGGAGGC	CACGCGCAACACTACTCCGTTGCCGAGCTCGA	ACACAAGAAGCACAGACTGCCTTCGCCGAGCA	CGTGTTCACGGGGAAGGGTCTCCGGGGCCTGC	GCCCGACCTTTCGCGTAAGCGTTCATGCACGG	GTGGCTCCGTCGTGGTGGAGTGGGACCTCGAGC
I-E	el Tatio		8	GTGGGCCCCCAGTACGATCCTTCCGCCCGGGC	CGGAGGGGGTCCGCGCTAACGCTCCACATCCC	GACTCGGCATCCGTTCCCCCTCGCGGGTGTTC	GCCCCGACCTCAATGATCTCGTTGGTGGCGCTC	GAGCGGCGCAGGCGGCCCGTGTCCGAGAGGGTC	TACGCCTTGCCCCAGCGCCCCTCGGCCACGTA	AGGGGACCATCCGGGGCTACAGCGCCCACCTC	GTTTCGCTGCCCTGGCCCCCCGCGGATATGACC
III	Vesuvius		16	AGCTACCGGCCTATCCGCCCCTAGGCCGGTACTGACCTA	CCACACGAGTTCATCGGGTGTAAGGTCGGGGCCAATACCCTCCTG	TCAAGCTCGTTCCAAAGGGCTAGCGCTTCTTCCCGTGAAG	CGCTGAAATCTGTGCCCCTCATCTTTCCTTCCAAGGC	ATGACGACAAAGCGCTCAACGGACGGGCAATCGTCAAGAT	ATTCATCCAACTGGTAGACTTTCATCTCTTTCTCCTTCATCTCT	ACCCGTGGAGTTCCGCGAGCCTCCGAGTGGCCTCCTCCAGGG	TTCACGACCCCGGGGCCGCGCAGGGTGTGGACCTCATAGCTCG	AAAGATCCAACACTTCAACAATGCCATTTCCCTTGTACTCGT	TGGCCGCTGGGGCTCCGGTAGGCGCCGCGGTGGCAACTGG	CAGAATCCGGTAAGGCCGGATACCGAAGCCTCCAATAC	CTCTTCAGTCGTTTTCGCCAGCTCGTTCGCCATCACGC	TCCCAGGAAAGGGCTCACCACCCGCTCCACCCCATCGGGGAG	CCCTAACATGGCTCCTCCTCAGTATTCCTTCCTCAA	TAGCGGTAGTAGGCCTGGCGCTCCTCGGGGGAAAGA	AGGTACAGCATGACCAGCTTTTCCGCCGCGCTGAGTT
III	Vesuvius		18	CTCCCAAGGACCTGTCGGATCCCGTTGGCCCACCTCTCTGCTT	GTGCCGAGCCAGACTCCAGTGATGACCCTCCTAATGTTGA	TGATCCAGTCCGCCAGCCGGTTGGTCAGGTCCGGATGG	TATTTCTCGCCAAGCTTCGTCGCTGTGCGCTCAA	CCGCAGGCTCGGCGCCATCTACTTGAAGCTCGCTATCGCG	AGGTACGCGTGATGGGGTCAAGGTCCGTCTTGACATAG	GGACGGCCCCGGCGATGACCCACCCGATGACGACGCTCACCAT	CTCACCAAGCATGCCCCCAGCGCCGTGGCCCCTTACTGCG	TACGCCTTATTCTCACCCCCCCCAAAGCGGGCAGCAAG	ATCTACTCCCTACTCCGCGCGCGTTTGCTCAAGGAGCCAT	GGAGTCGCAAGCCCGGTGCCCCCTCCCCAACGGCTCTGGA	ATCAAGCTCGGCAAAGACCAGGGTGTCCGATGCCGTGA	CCGGGCACTTTCACGGCCAGCACCTTGAGCAGGGGGATGAA	CGTAGACGATGGTCGTGGGCACGGGGATTGTTTCCGCGTAC	GCTCTGGACCTCCACCAGGACGCTCACCGCCTTGAGCCG	ATGCCTTTAGTGGCTCCAACGATTCGGTTTTTTGCCA	TCCTCCCACTCGGTGAGGGGGTATGGCATGAGCCCCTGG	ACACGCTCAAGCCGGGCCAAAAGCTTATCCTCGGTAGTAG
I-E	Uzon		17	GAAACGAGTATGGACTCCGAAGAGAAACCGCC	ACGTTATCCGCCTATAGCCTACCTCAGAAAGC	GCCCATGACGCCCAGGATATGCGGCAGAGTTTC	CCCATGCCCCCTGAAGGGGCTACCCCCCACGAC	CGTGCCCCGAGCTCGCGCTTCCTCGCCACAAC	AAGGGCAAACCCCCCCACGAGCAGGAGCAGC	GTGCGCACCAACCCGCTCAGGACCTTCCTCCC	GTTCCAGGTAACCGCCAAGACGGGCCACATAG	TTAGTACGAACAGGAATACCGGCGAGCCAGAC	TAAACATCCACGCCCACCTTGCGGTGCTGAGA	CTCTAGTTGAGTTTGGGGGGGGTTCCTCCCCCCC	GCCGGCGAGGTCCGGCCCCGCACCTTGGAGTTC	CTGGCCCGGTATGGGGTAAAGGCGAGCCTGGG	ACAATAATGCCAAAGGGAAACTTCTCCCTGA	GCGGCCTCAGCCCGCGAAACAGCCTCCTCAGC	GGAACCGGCAGAAGGTGGTGCGCAACCACATCC	GCCTACTGGACCCTGGAGCTCAAGGCCATCCGC
I-E	Uzon		28	TTCCAAGCCCGCCCAGCCCCGTACCCGAGCCA	GGGGTAGCAAAGAGGAAAGGGCAATAAGAAAC	TCAGACTCAATAGTACCGGACTCCACAGGGCACC	ACCTTCACTATGGCCCACCCCAGAGCGACGGA	TGGGTACCTTACTCGGTGCTCGGCCTGTGAGG	CCCCCCCGGCGCCCCAGGCAGAACCAGCCTGGGC	TACCTGGAGATTTCCGGCTTTTCCGTCCTCC	GGTCTGTGGACTGAGCAGTTCGTTGTGCCGTC	GACTTGCTCCGAATAACCAGCAAACCACGGATC	GGATTGTCGGTCCACTGATTAGGGTTAGGTAC	ACGCGGCTCATGAGGGGATTATAAAGCACCTA	GATCACCTTCCAGTCCGACCGGGACGGGCGCT	CATTATGGCTGCCCGGTACAAGTCCATGCTGAA	AACCAGCTCCAGCTCCTTAAAAACGCCCTGGA	AGGGCCCTCCTACCCCTAGGAGGGCAAGGACC	GAGTCAAGCACCTCAGGAAGAGCGTCAAGCTC	GGAAGCGACCAGACCTAAGGGTCCTGGTCCTA	CCCATGCCCCTGACGGGGCTACCCCCCACGAC	CGCAGCTGCACCGACACGCGCGAGCGTACCCA	GTGAAGCCGGACCACTGCCGACCACGAAGGTAC	GCAGCCCCGAACCTCAAGCAAAGGCAGCCCCG	GAGAGGGCGGCGACCAGCAAAAAGGGGACCAG	GAGGTGAAGCAGTCGTGATTGAGCCCGCCTATC	AGGCAGCGAGAGGGTCCAGGATAACCACACTAT	TTCTCGCTTCCAGCAAACTATCTATGCTCTCA	CTGGAGGGTAAGCTTGATTGGGACGTATCTGC	CGAGCATAATACTGCCCCAAACGCGGACCATAC	GTGGCCTCAAGAAGAAGGCCAGCCTCAGAAAG
I-E	Uzon		26	GAGCAGGCCGGCCTCGGAGGAGAGGGCCACCGA	CTTGGCCTGGGCCCGGGCCGCGGGGTCGTACT	GTCTTCCCCACCTTCGCCCCGTAATCGGCCCA	TTCGCACGGACAGGGATACGAGACAACCACAT	GGCGGCCATAGGAACCGTAGGAACATCCACGC	TTCGCACGGACAGGCACACCCATCAACCACATC	GGAGCAACCTTCTGGAGGCCCTTCCCACGGCG	CGCCTCTTCCTGCCCTACCTGGAGGCCTAGCA	TTAGTACAAACAGGGATACGAGACAACCACAT	GTAGGCGTTATAGCCCCTGACCAGAATAGCCT	CGGACAGAGAACCTTGCAGCAAATACAGGGCA	GGCCGCCTACGCCACACGCTCTGGTTCCGGGCC	TATGGACTCCGAAGAGAAGCCGCCGACCACGT	AACTCCATCCTGGAGACCGAGGCGGGCCAACA	CCTTGAGGCAACTGATAGGCACCCTCAGGCCA	ATGGCCCGCTTCTTAGGGTCCAACTCACGCTGA	GACCACCACGACCACGGGGGCGCCCAGGCCAT	AAGCGGAGGCCCGGATGAGCGGCCCCACGGGCA	AAGGTCAGAAGACTCGCCCGCGACGACATGAA	CCCGGCCATCCTCCCCCTGGAAACGGCCCGGC	CCGCACGGTAGCGATTAGCAGAATCATAAAC	GAGGATACTCCCGGTAGGTTACATAGGAATCA	GAACCACCACCTGGTCACGGGGGGCAGTAGCG	CGCTCTACTAACCCACGGCGAGGGACGAAAAG	AAAAGTGATTGATGTCCAGGTTGCCCTGGCTG	CAGGGAAGGGAAAACTCCACGTCCTCCCCCACA
I-E	Uzon		15	GTTAGCGATTTTCATCACCCCCCACACCGCCA	GGAAGGGCGGCGACTAGCAGGAAGGGAACCAG	GGCCAGGAGGAGGAGGCGGTTCGCATCTGGC	GTCAGGAGAGTCACCGGCGACGACATGAAGGG	GAGGGGGCGGGGGGGCTGTCGGAGTTATTCAGC	GGAGGCAACACCGCTATCAAACGGGACCCTCA	GTTCTCTGAGTGCCTATTTGGATTCTCAGTAT	TATGGGTAGGTTCTGGGGAGTCGCGGGGGCC	GAGGCCTCGGTCCTCATCCCCGGGGGGCTATG	AGAGCGAGCTGCTCGGCCTTGCGCAGGAGGGC	AACCTCAAACTCACCACAGGCACCAACTACCA	ACCCTACTCTCCATCCTGCACCTCCTTGACTC	CACATATACCCTAACAACTGGTCACGAGCAAACT	AGCCCGCTTCTTAGGGTCCAGCTCACGCTGAA	GCGTCCTCAAAGCGCATGGCCGCCCCGGTGGC
I-E	Uzon		18	AGTGGCTAACCCGGGAGTGGTCCAGGGTACTC	GAAAGGGCAGCCTCCCGCAACTGCATAGCCACC	ATGTGCGGCCTCCCGGACGACATGCTCTACCC	CGTTCTTCCGGGACTTGGGTCTTGAGGATGGC	CGACCGGACATATCCTCGTGCACGAGGAGGAAC	GCCTCGGGCAACCGATAGGCGCCCTCAGCCCA	GGCGGAGAGGGCCTGAGCCAGCCTCCTGACGCT	AGTCAGTTGAGGGGCGCCGGGGGAAAATGGCG	CGGGGGGGGTCACCTCCCCCCCACCGGGGGGG	GGTAGCTCCCAACCCAGAGAGGAGTAGACGCCG	ACCTAATCGCCAAGCTCTCCGACCACACGTGC	GAGGCCGTGGAGCTGGTGCCCGCCCCGGCGAGA	GGTGCAGAAGCTGGCCCGGCCCGAGGGAGGCC	GAGGTCAGCATGCCGCGAGCTGAGGAGTTGAG	TGGCCTTTAGAAGCTTCACGGGCGCATTATGG	CCGGGGGGCACGGCGAAGGGCCTGGGCCGCTC	GAGGTGAGGGTGTAGCCCGTGTTGGGGACGCT	GCCTCAGCCAGGCGCTTGACGCTATCGGAGC
I-E	Uzon		10	ACGAGCCCCAGGGTCCACAGGCCCAGGATGAC	GACTGCCTCCTCCCCCACCTTCCAGCCCTCCC	GTTGCTCCTTTTCCGAATATGGGTAGGTTCTG	CCCGTTTATGAGAGAAGGATGAAGGTAAGGA	ACGGGAAACGGCCGGCCAGCACACCAGAGAGA	GCCAGGGTGGAGTTCAAGGAGCTTTTCCTGGG	AAGTCTACGGGCGCTACACCCGGAGGAAGGAGGGA	CGGGACCAGTCCAGAGCCTCTTCCCCAGGAGC	TGGCTCCGCATATCCTGGGCTTTCTGGGGCTC	AAGCCAGAGAGGATCAACAGGAGCATCACGCA
I-E	Uzon		18	GCGGCGTGAAGCGCCTCGAGGGGACGAACTAA	GCCTTCCACCACAACTCACCTCCTTTCCCCCGC	GGCGGCCGGAAGGGGAAGGGCCTCCAGAAAAT	GGCAACGAGACCGACACGCGCGAGCGCACCCAC	AGCAGCCTAATGAGCCCTTCCACCATATCTA	AGTTATGCTTTGGTCCTCAAGGGCCTTCAGGC	CCCCCTGCCAAAGCCACCGAGTATAGGCAGAG	CACACGGTTAGCCGCCTCAGGGCGAGCACGAA	CGCAAAGCGGGGGGGGTCCTCAGGGTCCCGGG	GCGATGGCCCGCTCCGCGATGAGCCCCTGGGT	GAGGCAACACCGCTATCAAACGGGACCCTCAT	GGGGGAGGGGCCGCGCGGCGCCCCAGCGTGTGCA	GCGAGACCGAGAGCCAGAGCCAAAACGGGAAG	TCACCACACGAACCAACCACCACACACCTATCC	GGCTCGTTCCGGATGTTTCTCAGGTCCAGTCT	GTCGGCCCGGGCGATGGCCTCATCCAGGGTCA	AGCATCGTCCAGCTCCTGGTGAACGGCCAACCC	GGGTATGACGTCCCCGAGTTCCTGGGCAAGC
I-E	Uzon		31	CACGAAAGGGAAAAATGATGCTCGCGCACAGC	TCTCCAGGGCCTCCACGAGCCAGGAAACGACA	ATGAGCCACCAAGGACGACCCATAGAAACCTC	GCTACTGAGGCTCAGGCTCGTGCTCGTTTGGA	AGGGGGACATAACCCATGCACCCGGAAGAGCC	CCCACGCCCCCAGGGGTCTGAGCCCGGGTGCC	TGCTTGCTCGCCTCGGTTCCATTGAGGGGCAT	ACATACCTCACCTCCTAGCACCAAACACCTAGC	CAAACAGCGCAAACAAGTGGCAAAAGGTGGGA	AGAGAAGAGCAACCTAATGAGCCCTTCTACCA	AAGTACCTGAAAGGCTAACATGTCTCGGGTCC	AAGTTCCTTGCGGTAGCGGCGAGCCATTGAAA	CAACTTCTTCACGTGGCTCGGGGCCACCATCC	CCTCAATCATCTGCCACCCCGCAGGAAAGTGA	CCGGTGTGGCTTCTGTTCGGGATTCTGAGGA	GCCAGCGTCTCCAGCGTCCAGGCCGCCGTGCG	CGCTCAGCCAGCACACCAGAGAGAGCATGGAGC	GAAAGCGGCTTCAAGGAGGAGGCCAGCCTCGG	AAGACCGGCCTCGGAGGAGAGGGCCACCGA	GGTATACCTATCTTCATGGGCTTCCCTCCCTGC	GCTCTGCTCTCCAAAATCAACGCTTTGGCTAC	CCTTGGAGGGGGTGAGGTGATATGGCGGCAGAC	AACTGCTCAACCCAGAGGCCCTTCACGCCTTGC	GGGTTGCTCCTGCTCGTGGGCGGTTTTGCCCTT	TGGCCCAAGAGCCAGAACACGGCGTTGAGGA	CTCTGGCCGTGGTGACGCAGCACGCCTTTGA	TGGAGCCCGGTACCTTTGGCCTTGAGGATGTA	TACCCCAGGTTTTTGTGGGATGTGTCGGAGGT	GACCCCTACTGGGGGAATCCCTTTGAGGAGGA	GGCAACGGGAACACCAGAACCACCACAAACAGC	AGGACCAACCTGGACCAGACGGGAGCCACGGG
I-E	Uzon		11	CTGTTCTCTTTAGGGGCTACAATGCGTACCTT	AAGTACCTGAAGGGCTAATATGCCTCGGGCCC	GCGGACTATGGGAGGCTCAAAAATGGCATAGG	CCTCTCACTGCGATGCTTCTGAGGACCTATGA	GAAGCACCCTTGAGGAGGTCATAGCGTGGTCT	TAGGCTTTCACGCTTCCAGGCGGCGGTTGAGC	ATAGGTGTTTTGGATTGTGCCGTGAGGGTGGG	GGTCGGGCTCTGGGAGTTAACGCTCAACCGC	ACGCTGTGGTAATGCTTCTCGGCATGGAGGAA	CGCGTCAAGGTAGGCAAAAGCGTTCTTATTCCC	GTCCACCAGGGCGTGAATGTGAGGGGCTCCAG
I-E	Uzon		16	GGCATCTAGGAAGAGAGCCCTAGCCTGCAGAT	CTTCCACCAATGCCGCCGCATACCCACCTCCT	TGATGCTGGAGTGTGTTCAAATAGAGAATGGC	GGTCCCCCCCTCTTGGGAGGAGGGCCCTGAGC	TTGCTTGCGGTAGCGGCGAGCCATTGGAAAAG	GGGGCGGTTCAAGGAAGCACCCTTGAGGAGGT	GACGGGGAGTTCTATCTCCTTCAGATAGCTTCT	GAGTGGCTAACTCGGGAGTGGTCCAGAGTTCT	TCCTTGGAAGCTAGAGTTAAACCTCTCGCTGCA	AGCACCGGCACCCGCCAGCGGTTGGTCACGCC	TAGAGGTACACGTTCAGGGGGCGGAAATCCACC	CTCCCCCTCGGCCAGCCGAACGGAATACCCA	CCAGGAAACGACAGCCTGAGCATCGCGCCGAGC	AATGGCTAACTCGGGAGTGGTCCAAGGTCCTC	GAACGAGGCCACAAGGCCAGCACCGACTCCCC	AGCTCAAACTCACCACACGAACCAACCACGAC
I-E	Uzon		18	GCCTGAAGCTCAGCGCGAGAGCTTTCTAAGCG	GGGGAACGCCCAAAGAGCTCTCTCCTAACCGG	TGCGGGGCTACCTGCCCCCCGCCACCACGTT	TTTGCGGCGGCTATGGAGAAGCTTTTGTTTCT	GTCCTGAGCCGCCTGAGGCAGATGGGCTATCTC	GGGGCAACCGCCCTCGAGGCTGGGGCCCTAGCC	GCGGCTCGCCTTGTAGTGGCTTCTACTCCTC	TCCACGAACCAGAGCCAGGACGGAAAAATCCC	GAAGTGGCCTATCTAGACCCCATGGGGCAAGA	AGCTCCCCCTGGACGGCCGGGGCCCCGCACTGC	TAGAGGCTCCGCACGCCGACCTTGACCATCTT	AGGAATCCCAGTATTCTGGGGGTAGGGACTCCC	ATGGCCTCCTCCGGGTTGACCCTGAACTGCTCC	AGCCCCCTCCCCGTGGCGGCGGAGGGCCTCGA	CTCTTGCTCTTGTCGGTCGGGTTGGCCGTTCC	CCGAAGTTGGCGTAAATGCGGCGACCCTCAC	GACGACCGACAAATCGCGCACAGAGTACGCCAT	CTCGCGGTAGAAGTTCTCCACCTCGCCCTGCT
I-E	Uzon		17	ACTGGATACGGGCCCAACCCCCGAAGCGGCGG	TTGGCCGACTCGCTGAAGGGGTCCGGGGACGC	TGTGCCAATCCCTGACATCACTCCCATCACCA	AAGCTATCAGGGGGGCGGTTCAGGGGAGTAC	GTGGTTTCTATGCTGGGCCAGGTGTCTAGGTT	AGCTCCACCGGGAGAGGCGCACCATTGAGCGC	GCCGGGTTAGCTGGCGGTCGGTGGCTGAGGCGT	TCTACTCGCTGGTTGCTCTGCGTTTCGTTTAT	GGCGCGGCTCAGGCCTTCCTTCGCGGGGCCGC	GGGTTGATTCCGTCATACGAGCGCCTCCAATC	GGGGGTACTCCCGGTAGGTTACATAGGAATC	CCCTTTCCCACGCGTTGGAGAACGCACCGTTC	CAGATGGGGGTTCGGGTGGAGGTCCTTCCCTCC	GCGGCGTGAAGCGCCTCGAGGGGGCGAACTAACC	GCGACCTGAAGCGCCTCAAGGGGGCGAACTAA	GCCCACATATCCAAACGAGCACGAGCCTCAGCC	AGGTCCACGAGAGCATCCTCGAGACCCCCCGC
I-E	Uzon		14	GAGGCGGCCCAGGCGGCGGCGGAGGCGGTGA	ACTCAGGAGGCAGAGTGAGCGTAATCATGTGA	GGAAAGCGACCAGACATATCCTGCCGGAGAGC	CGGTGGCGGAGGACAGGATGCAGTTTTTCAAC	GGAACCAGCCAGCGCCGCCGCATATCAGCCTC	TCGCCGGAAGATGTTCCGAAGAAAAGAGGCCA	CCTGTTCCCCAGGAGCGGAAGGCTCAGAAGGA	AACAAGGACGGCTCCATCAACTGCACGCTAC	TGCTACGCGCGCCTTTGGGCCGCACGTACCCGC	GGAAGGGCTAGCGCTGGACATCCAGGCCCCTC	TTGGCGAGCTTCATGACTCCCCACACCGCCAG	GGCGCAACCGACCTCGAACCTCAAGGGGACTC	AGGACGCGGTTTGGACACGCGGCAAGGGCACC	CAGGACGTGCGGGAAATCCGCTCCCGGCTGGA
I-E	Uzon		24	GTTGATGGGTGTCCCTGTCCGTGCGAACTTCACC	GCCCATACCGTCACGAATGAAGGTGAAGAGGG	TTGCGAATCTGTTGCGCGGGAGTGGCGCATGA	TCCAGAGGCGATTACGATATGGAGCACTGCCA	TATACGAGTCCCTAGCCTACCAGGTACCTATC	GTCCCACGGAAGCGCGACAGGAACGCCAGAACC	CCTCTGGGTTGAGCAGTTCTTTGTGTCGCCTGA	AACAAATCCAGCAATGAGGCCTTCCAGAAGCAT	GACGTAGCCCAGGAAGCCCGTGCAAATAGGTAT	GAAGGCGGCCTCGAGGAGGAGACCAGCCTCGG	CCCGGCAGCACCTTGAAGGAATCAACGACCTC	TGTGCCACTCCCTGACATCACTCCCATCACCAG	ACCTTGGAGGCGAAGGTCAAGCCCTTGACGGC	ACAAAAGGAAGGGCGGCAACTAGCAAGAGAAC	AGGAAGGTACTGGTCAAGAGGAAGCATAGCCA	AGATGAAGGTGCGGATGCCAGCCGTTGGGCCC	AAGCTATCAAAGGGGCGGTTCAGGGAAGTACGC	AAAACATCGACGCCCACCTTGCGATGCTGAGA	TTGGAAGGAGTGGCTAACTCGGGAATGGTCCA	TTCGGTCTGGTTCCGGATGCGTACAGGTACGG	CCGCCACGAGAAGCGCATCCCAGAGAGAGGCT	AATGAGGACGGGGTTTGCACACGCTGGGGCGC	GCGAGAAAGAGGGCGGTTTCGTTACTTCCGTG	AACAGCTTCGGAGAGGGAATCACGCACAGAGT	GTGGAGTGATGGAAATGCAGGAGCGCCAACTC	GGGCGGTATGTCAAGGGGCAACCCACGCGCCCGGA	CCGACACGAGGGTCGGGCTCTGGGAGCTCAGGC
I-E	Uzon		19	ACAAGAGGAAAGGCGGCGACCAGCAGGAAGGGAACC	CACGGAAGGGAAAAATCATACTCCCGCATAGC	CGGGGGGGGTCCTCACCAAGGTCCCGGGGGAG	TGCTCAACTACTTCGGCCTCATTGTGGCGGCA	CTGGAAGGCTCAGCGGAGAAAATCCTCCACCA	GAGGTGAGGAGGAGTGAGAGCCGCCACGTACAC	GAGGTGAAGCAGTGATTGACCCGGCCTATCTG	GCGAGCTTTTTAAGCTGTTCCCGGAGGGCATC	GGGCAGGCACAACCCATGCACCCGGAAGGGCG	CCACAGCCAGGAGGGCGGAATCCCGGCACGAG	GGGGCGAACTAACCACCAAACGAGGGCCGAAT	ACGTGAAGCGGTCCACATCCTCAAGGCCAAAGGT	GGACTCCCAGACCGCAGGCGGGACCGTGAGC	GCCCAGGACCCGCCCAGTACCGCCGGCGAAGCC	CCCCGTGGTACCCACGGGACCCGTGCAACCTG	GGCTACGGCTATACCCGTATGCGTGATGCTCCT	CTTCTCAGGAAAGCCCTCGGGCAACTGATAGG	GACCGCCGGCACCCTCCCCCTCGAGAAGCCACA	GGGGTGAGTCGTGGAAGGCCTCGTTCCGGATGT
